# Supplementary material
Source: PubMed Central journal article supplement (PMC2099636)
Supplement: bjpg57-538FigureS4.pdf [file bjpg57-538FigureS4.pdf]

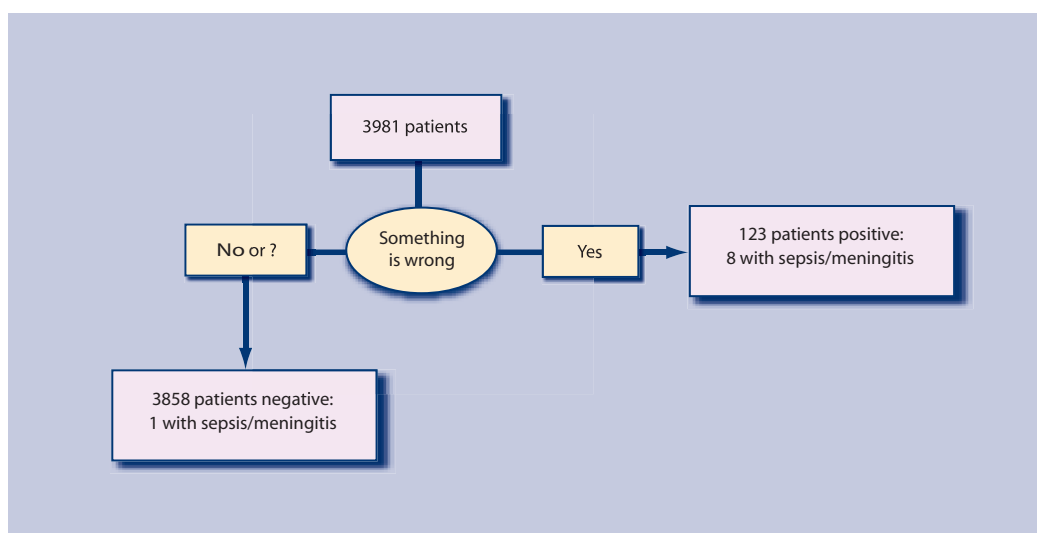

Supplementary Figure 4. Classification tree for sepsis/meningitis (tree 9), using all variables.

Van den Bruel A, Aertgeerts B, Bruyninckx R, *et al.* Signs and symptoms for diagnosis of serious infections in children: a prospective study in primary care. *Br J Gen Pract* 2007; **57**(540): 538–546. ©British Journal of General Practice
