# Supplementary material
Source: PubMed Central journal article supplement (PMC2099636)
Supplement: bjpg57-538TableS6.pdf [file bjpg57-538TableS6.pdf]

Supplementary Table 1. Bivariate analyses for all variables in the unselected patient population

|                                                              | Sensitivity<br>(95% CI) | Specificity<br>(95% CI) | PPV<br>(95% CI)       | NPV<br>(95% CI)        | LR+<br>(95% CI)         | LR-<br>(95% CI)     | OR<br>(95% CI)          |
|--------------------------------------------------------------|-------------------------|-------------------------|-----------------------|------------------------|-------------------------|---------------------|-------------------------|
| Physicians' opinion: something is wrong                      | 63.33<br>(46.09–80.58)  | 97.30<br>(96.79–97.81)  | 15.45<br>(9.06–21.83) | 99.71<br>(99.54–99.88) | 23.48<br>(16.85–32.71)  | 0.38<br>(0.24–0.60) | 62.30<br>(28.91–134.24) |
| Parents' opinion: illness different from previous illnesses. | 46.43<br>(27.96–64.90)  | 96.76<br>(96.20–97.33)  | 9.49<br>(4.58–14.40)  | 99.60<br>(99.39–99.80) | 14.35<br>(9.30–22.15)   | 0.55<br>(0.39–0.78) | 25.92<br>(12.08–55.65)  |
| Illness duration ≥48 hours                                   | 48.39<br>(30.79–65.98)  | 46.54<br>(44.96–48.12)  | 0.72<br>(0.36–1.09)   | 99.11<br>(98.68–99.55) | 0.91<br>(0.63–1.30)     | 1.11<br>(0.79–1.56) | 0.82<br>(0.40–1.66)     |
| Body temperature ≥38°C                                       | 82.76<br>(69.01–96.51)  | 45.82<br>(44.10–47.53)  | 1.34<br>(0.81–1.88)   | 99.67<br>(99.37–99.96) | 1.53<br>(1.29–1.81)     | 0.38<br>(0.17–0.84) | 4.06<br>(1.54–10.66)    |
| Body temperature ≥39°C                                       | 55.17<br>(37.07–73.27)  | 76.00<br>(74.53–77.47)  | 2.01<br>(1.04–2.99)   | 99.48<br>(99.19–99.76) | 2.30<br>(1.65–3.21)     | 0.59<br>(0.39–0.88) | 3.90<br>(1.87–8.14)     |
| Body temperature ≥40°C                                       | 20.69<br>(5.95–35.43)   | 96.49<br>(95.86–97.12)  | 5.00<br>(1.10–8.90)   | 99.27<br>(98.98–99.57) | 5.90<br>(2.83–12.30)    | 0.82<br>(0.68–0.99) | 7.18<br>(2.87–17.97)    |
| Upper respiratory infection                                  | 67.74<br>(51.29–84.20)  | 31.90<br>(30.44–33.36)  | 0.78<br>(0.45–1.12)   | 99.20<br>(98.71–99.70) | 0.99<br>(0.78–1.27)     | 1.01<br>(0.61–1.69) | 0.98<br>(0.46–2.10)     |
| Coughing                                                     | 61.29<br>(44.14–78.44)  | 52.71<br>(51.15–54.28)  | 1.01<br>(0.56–1.47)   | 99.42<br>(99.10–99.75) | 1.30<br>(0.98–1.72)     | 0.73<br>(0.47–1.14) | 1.77<br>(0.85–3.65)     |
| Dyspnoea                                                     | 38.71<br>(21.56–55.86)  | 95.84<br>(95.21–96.46)  | 6.86<br>(3.11–10.60)  | 99.50<br>(99.27–99.72) | 9.30<br>(5.83–14.85)    | 0.64<br>(0.48–0.85) | 14.54<br>(6.94–30.46)   |
| Changed breathing                                            | 38.71<br>(21.56–55.86)  | 91.27<br>(90.38–92.16)  | 3.40<br>(1.51–5.29)   | 99.47<br>(99.23–99.71) | 4.43<br>(2.81–6.98)     | 0.67<br>(0.51–0.89) | 6.60<br>(3.18–13.72)    |
| Tachypnoea                                                   | 32.26<br>(15.80–48.71)  | 96.70<br>(96.14–97.26)  | 7.19<br>(2.90–11.49)  | 99.45<br>(99.21–99.68) | 9.78<br>(5.71–16.74)    | 0.70<br>(0.55–0.89) | 13.96<br>(6.44–30.25)   |
| Crepitations                                                 | 32.26<br>(15.80–48.71)  | 94.59<br>(93.88–95.31)  | 4.55<br>(1.79–7.30)   | 99.43<br>(99.19–99.67) | 5.97<br>(3.52–10.11)    | 0.72<br>(0.56–0.91) | 8.33<br>(3.87–17.92)    |
| Decreased breathing sounds, dullness on percussion           | 20.00<br>(5.69–34.31)   | 97.85<br>(97.40–98.31)  | 6.74<br>(1.53–11.95)  | 99.37<br>(99.12–99.62) | 9.32<br>(4.42–19.67)    | 0.82<br>(0.68–0.98) | 11.40<br>(4.54–28.63)   |
| Does not laugh any more                                      | 42.86<br>(24.53–61.19)  | 89.88<br>(88.93–90.83)  | 2.96<br>(1.31–4.61)   | 99.54<br>(99.32–99.77) | 4.24<br>(2.73–6.56)     | 0.64<br>(0.46–0.88) | 6.66<br>(3.13–14.18)    |
| Somnolent                                                    | 30.00<br>(13.60–46.40)  | 86.64<br>(85.57–87.72)  | 1.72<br>(0.61–2.84)   | 99.37<br>(99.11–99.64) | 2.25<br>(1.29–3.90)     | 0.81<br>(0.64–1.02) | 2.78<br>(1.27–6.10)     |
| Changed crying                                               | 35.71<br>(17.97–53.46)  | 96.60<br>(96.03–97.17)  | 7.04<br>(2.83–11.25)  | 99.52<br>(99.30–99.74) | 10.51<br>(6.22–17.76)   | 0.67<br>(0.50–0.88) | 15.80<br>(7.15–34.88)   |
| Inconsolable                                                 | 20.00<br>(5.69–34.31)   | 96.39<br>(95.81–96.98)  | 4.08<br>(0.88–7.28)   | 99.37<br>(99.11–99.62) | 5.54<br>(2.66–11.55)    | 0.83<br>(0.69–0.99) | 6.68<br>(2.69–16.60)    |
| Drowsy                                                       | 38.71<br>(21.56–55.86)  | 94.14<br>(93.41–94.88)  | 4.98<br>(2.23–7.73)   | 99.49<br>(99.26–99.72) | 6.61<br>(4.17–10.47)    | 0.65<br>(0.49–0.86) | 10.15<br>(4.87–21.17)   |
| Irritable                                                    | 22.58<br>(7.86–37.30)   | 90.34<br>(89.41–91.27)  | 1.82<br>(0.48–3.16)   | 99.32<br>(99.05–99.59) | 2.34<br>(1.21–4.52)     | 0.86<br>(0.71–1.04) | 2.73<br>(1.17–6.37)     |
| Moaning                                                      | 10.00<br>(0.00–20.74)   | 98.31<br>(97.90–98.71)  | 4.35<br>(0.00–9.16)   | 99.30<br>(99.04–99.56) | 5.90<br>(1.97–17.73)    | 0.92<br>(0.81–1.03) | 6.45<br>(1.91–21.78)    |
| Unconsciousness                                              | 9.68<br>(0.00–20.09)    | 99.51<br>(99.30–99.73)  | 13.64<br>(0.00–27.98) | 99.28<br>(99.02–99.55) | 19.89<br>(6.20–63.78)   | 0.91<br>(0.81–1.02) | 21.91<br>(6.13–78.28)   |
| Decreased eating and drinking                                | 36.67<br>(19.42–53.91)  | 76.23<br>(74.89–77.56)  | 1.17<br>(0.48–1.86)   | 99.36<br>(99.08–99.65) | 1.54<br>(0.96–2.48)     | 0.83<br>(0.63–1.09) | 1.86<br>(0.88–3.91)     |
| Vomiting                                                     | 22.58<br>(7.86–37.30)   | 80.23<br>(78.98–81.47)  | 0.90<br>(0.24–1.56)   | 99.24<br>(98.94–99.54) | 1.14<br>(0.59–2.20)     | 0.97<br>(0.80–1.17) | 1.18<br>(0.51–2.76)     |
| Diarrhoea                                                    | 16.13<br>(3.18–29.08)   | 83.66<br>(82.50–84.82)  | 0.78<br>(0.10–1.46)   | 99.21<br>(98.91–99.51) | 0.99<br>(0.44–2.21)     | 1.00<br>(0.86–1.17) | 0.98<br>(0.38–2.57)     |
| Weight loss                                                  | 7.41<br>(0.00–17.29)    | 96.99<br>(96.45–97.54)  | 1.74<br>(0.00–4.13)   | 99.32<br>(99.05–99.59) | 2.46<br>(0.64–9.47)     | 0.95<br>(0.86–1.06) | 2.58<br>(0.60–11.03)    |
| Dehydration                                                  | 3.33<br>(0.00–9.76)     | 98.66<br>(98.30–99.02)  | 1.89<br>(0.00–5.55)   | 99.25<br>(98.98–99.52) | 2.49<br>(0.36–17.43)    | 0.98<br>(0.92–1.05) | 2.54<br>(0.34–19.01)    |
| Tummy ache                                                   | 8.33<br>(0.00–19.39)    | 79.74<br>(78.43–81.04)  | 0.27<br>(0.00–0.64)   | 99.25<br>(98.94–99.56) | 0.41<br>(0.11–1.55)     | 1.15<br>(1.02–1.30) | 0.36<br>(0.08–1.52)     |
| Urinary symptoms                                             | 10.34<br>(0.00–21.43)   | 98.25<br>(97.82–98.67)  | 4.41<br>(0.00–9.29)   | 99.29<br>(99.02–99.56) | 5.90<br>(1.97–17.70)    | 0.91<br>(0.81–1.03) | 6.47<br>(1.91–21.90)    |
| Impaired peripheral circulation                              | 10.00<br>(0.00–20.74)   | 99.74<br>(99.58–99.90)  | 23.08<br>(0.17–45.98) | 99.31<br>(99.05–99.57) | 38.76<br>(11.23–133.83) | 0.90<br>(0.80–1.02) | 42.96<br>(11.20–164.81) |
| Cyanosis                                                     | 6.67<br>(0.00–15.59)    | 99.87<br>(99.76–99.98)  | 28.57<br>(0.00–62.04) | 99.29<br>(99.03–99.55) | 52.17<br>(10.53–258.42) | 0.93<br>(0.85–1.03) | 55.83<br>(10.39–299.99) |
| Convulsions                                                  | 6.45<br>(0.00–15.10)    | 99.69<br>(99.51–99.86)  | 14.29<br>(0.00–32.62) | 99.25<br>(98.98–99.52) | 20.68<br>(4.83–88.56)   | 0.94<br>(0.86–1.03) | 22.03<br>(4.72–102.88)  |
| Rash                                                         | 6.45<br>(0.00–15.10)    | 96.66<br>(96.09–97.22)  | 1.52<br>(0.00–3.60)   | 99.23<br>(98.96–99.51) | 1.93<br>(0.50–7.45)     | 0.97<br>(0.88–1.06) | 1.99<br>(0.47–8.44)     |
| Headache                                                     | 4.76<br>(0.00–13.87)    | 79.14<br>(77.80–80.48)  | 0.14<br>(0.00–0.40)   | 99.29<br>(98.98–99.60) | 0.23<br>(0.03–1.55)     | 1.20<br>(1.09–1.33) | 0.19<br>(0.03–1.42)     |
| Meningeal irritation                                         | 3.33<br>(0.00–9.76)     | 99.87<br>(99.76–99.98)  | 16.67<br>(0.00–46.49) | 99.25<br>(98.98–99.52) | 25.65<br>(3.09–213.04)  | 0.97<br>(0.91–1.03) | 26.50<br>(3.00–233.97)  |
| Petechiae                                                    | 3.23<br>(0.00–9.45)     | 99.74<br>(99.58–99.90)  | 9.09<br>(0.00–26.08)  | 99.23<br>(98.96–99.51) | 12.53<br>(1.65–94.90)   | 0.97<br>(0.91–1.03) | 12.91<br>(1.60–104.04)  |
